# Supplementary material for: Fast uptake, water-soluble, mitochondria-specific erbium complex for a dual function molecular probe – imaging and photodynamic therapy
Source: Royal Society of Chemistry journal article supplement (doi:10.1039/c2ra22056c), 2012-11-13
Supplement: c2ra22056c.pdf [file c2ra22056c.pdf]

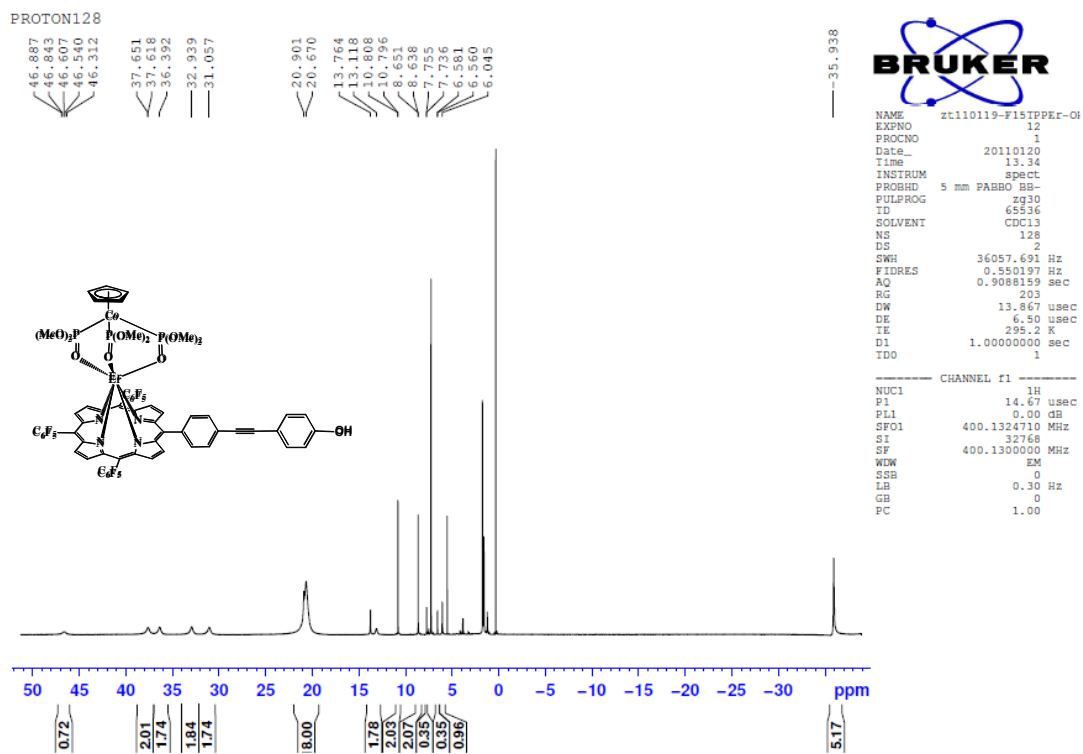

Figure S3. 400 MHz-<sup>1</sup>H-NMR (CDCl<sub>3</sub>) spectra of Er-1

P31

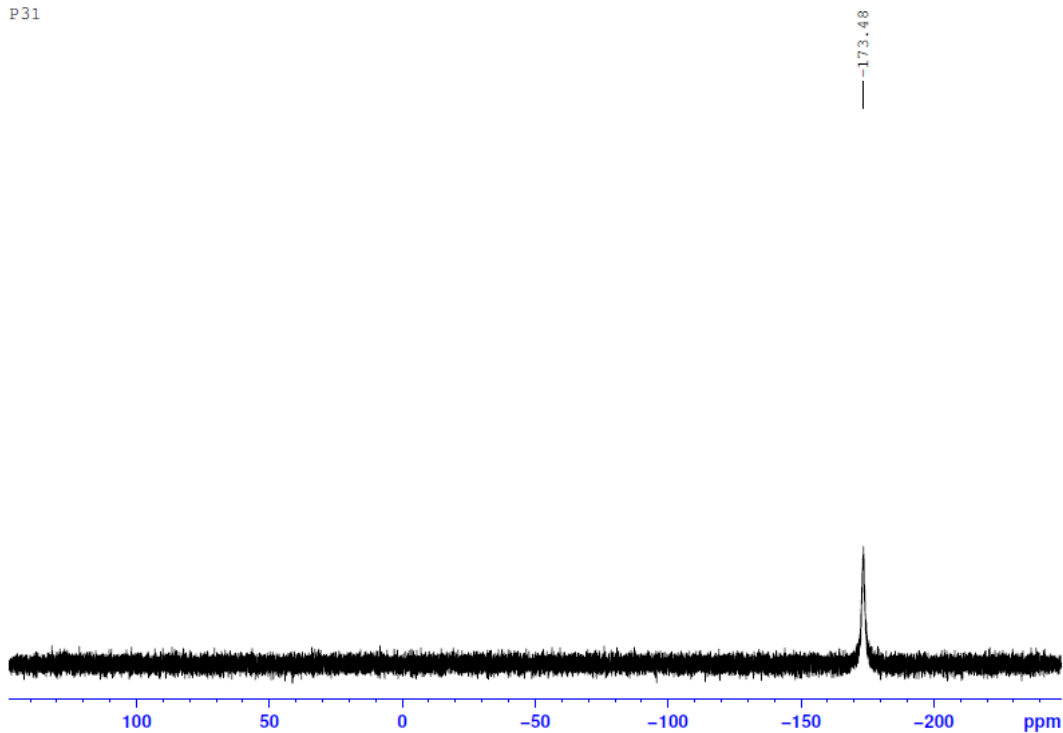

Figure S4. 400 MHz-<sup>31</sup>P-NMR (CDCl<sub>3</sub>) spectra of Er-1

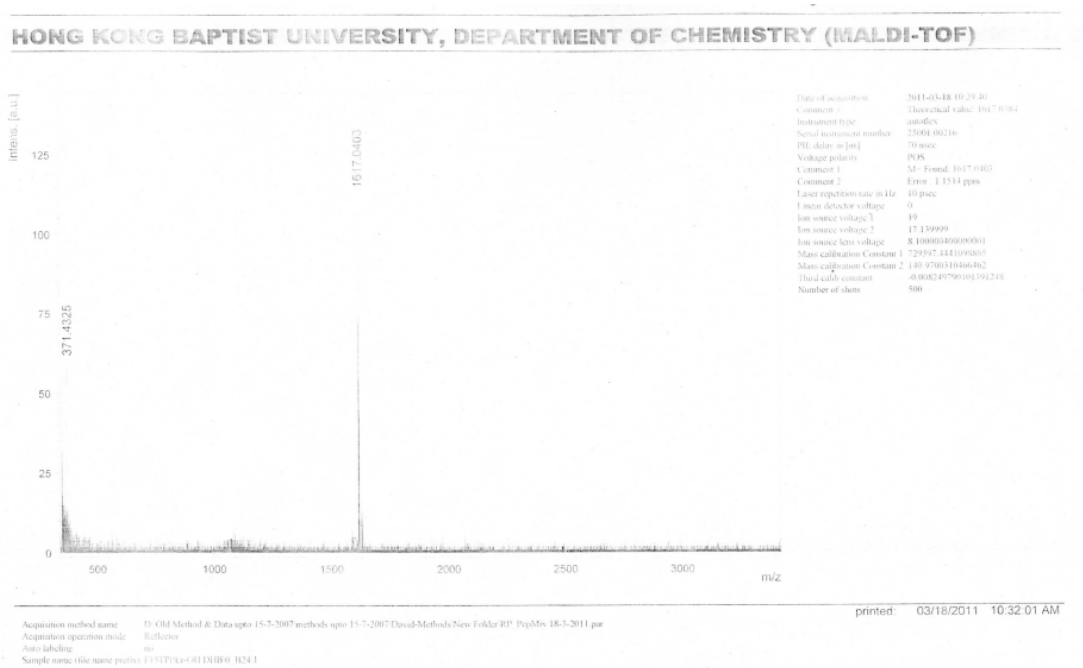

Figure S5. MALDI-TOF spectra of Er-1

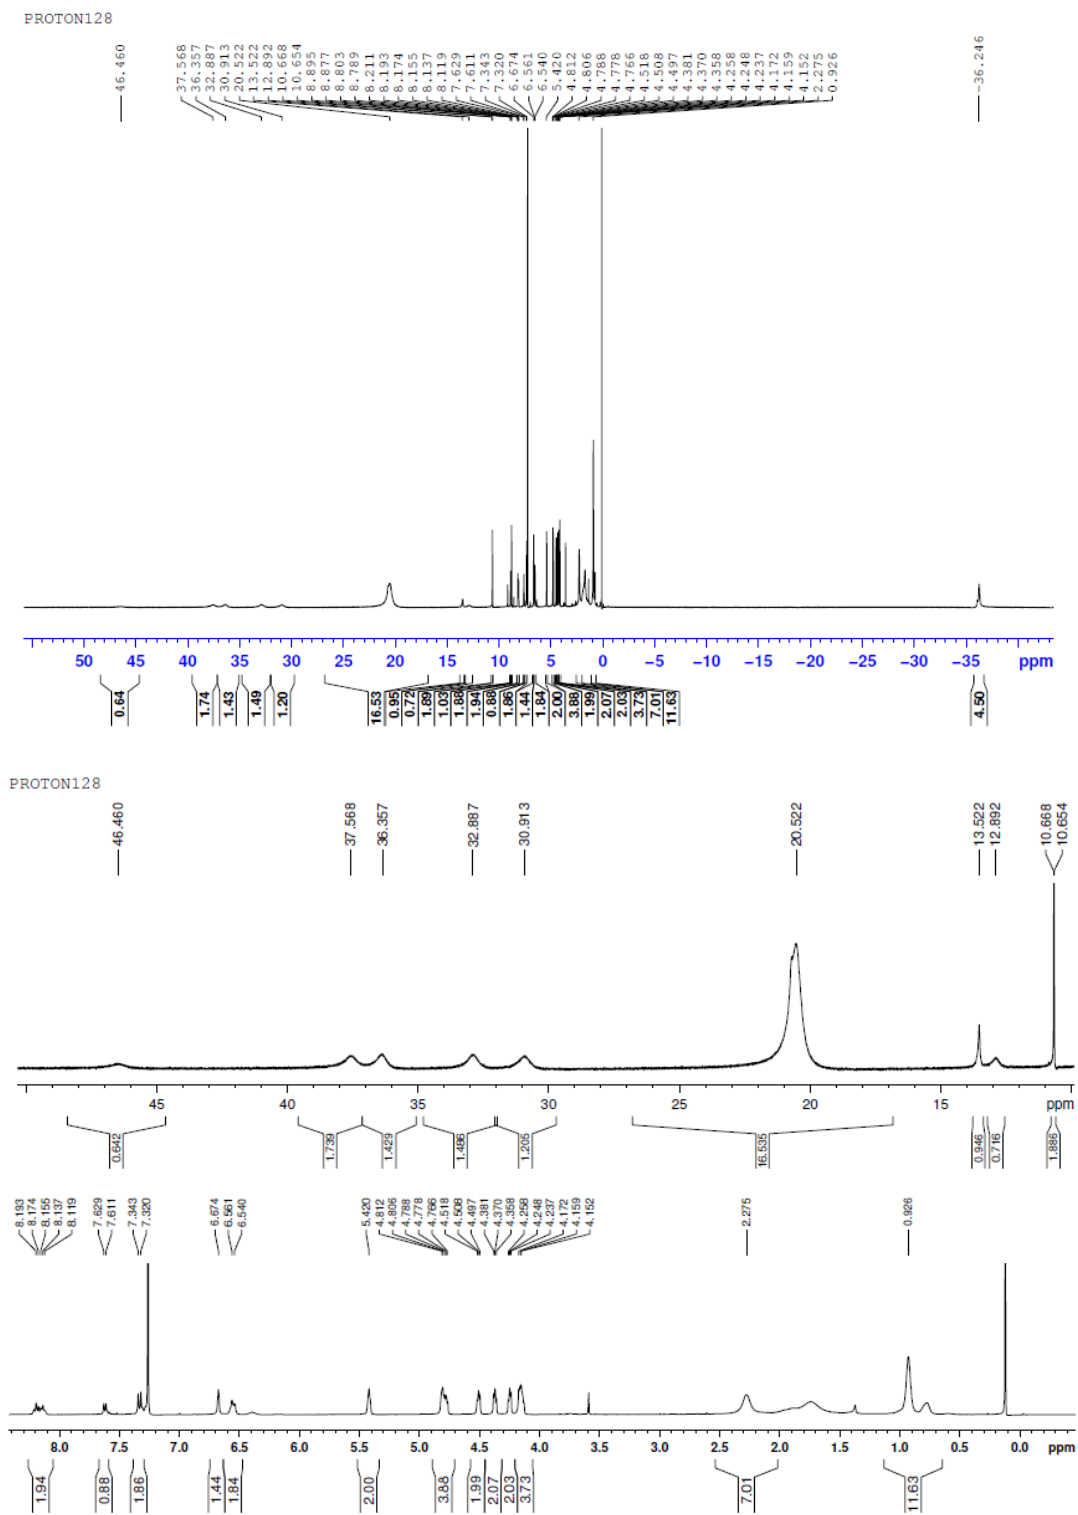

Figure S6. 400 MHz-<sup>1</sup>H-NMR (CDCl<sub>3</sub>) spectra of Er-L

P31

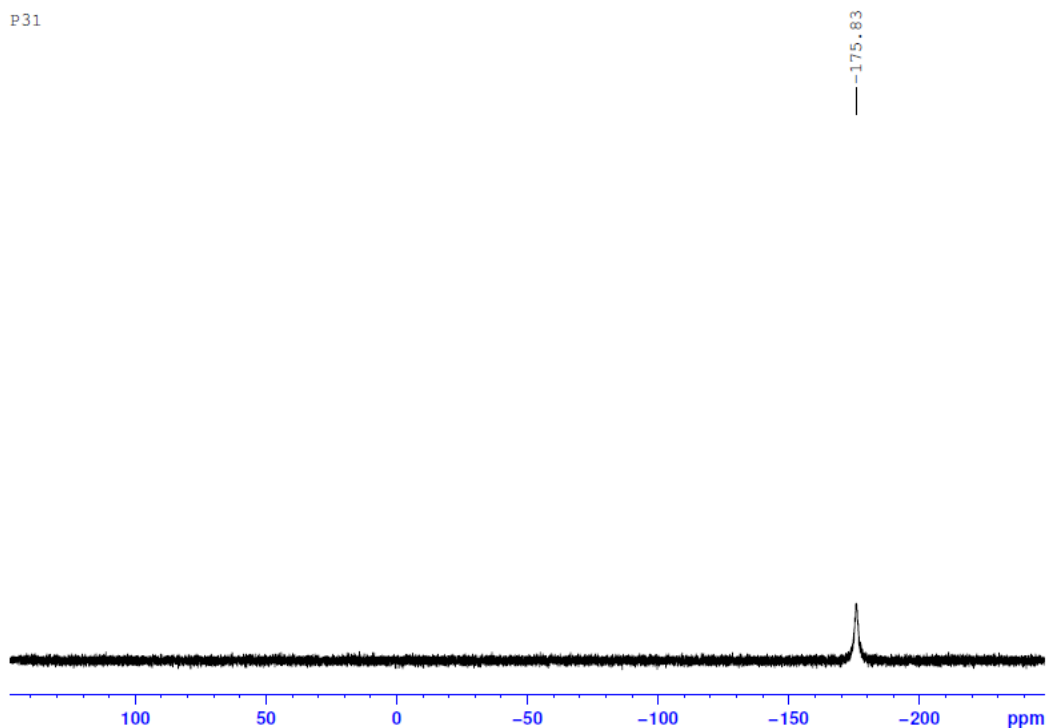

Figure S7. 400 MHz- $^{31}\text{P}$ -NMR ( $\text{CDCl}_3$ ) spectra of Er-L

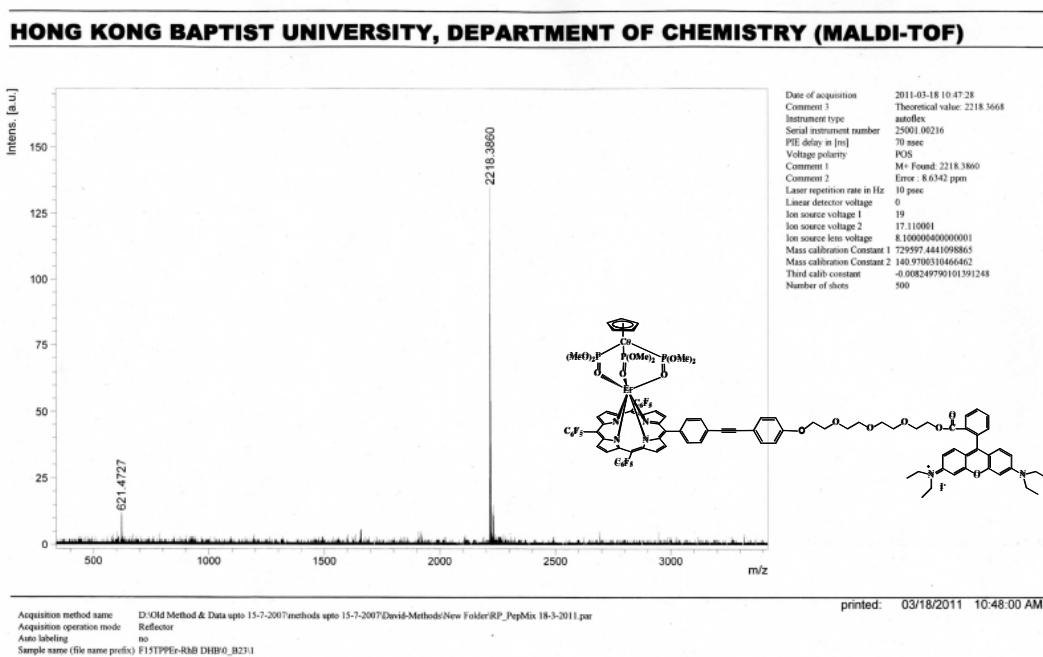

Figure S8. MALDI-TOF spectra of Er-L

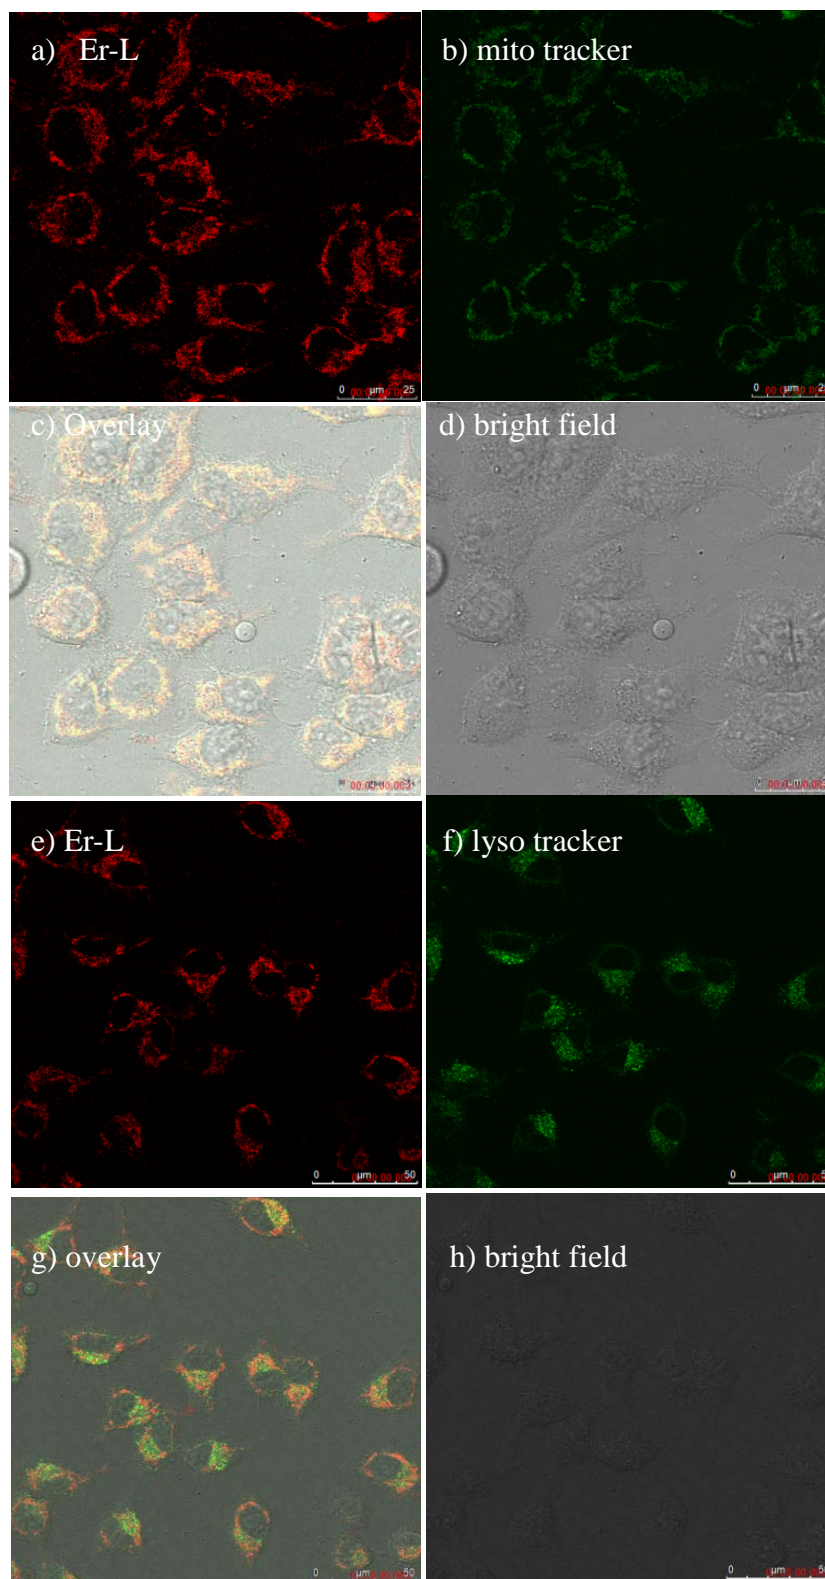

Figure S9 *Confocal microscopic analysis of subcellular localization of Er-L with commercial mitochondria (positive control) and lysosome (negative control) specific marker. Positive control: (a) Linear confocal microscopy images of the red in-vitro emission from Er-L (10  $\mu$ M,  $\lambda_{\text{ex}} = 430$  nm), 30 min exposure in HeLa cells; (b) Green mitochondria marker – Invitrogen M7514 (1  $\mu$ M,  $\lambda_{\text{ex}} = 430$  nm, 3 min exposure) in HeLa cells; (c) Merged image; (d) Bright-field image. Negative control: (e) Linear confocal microscopy images of the red in-vitro emission from Er-L (10  $\mu$ M,  $\lambda_{\text{ex}} = 430$  nm), 30 min exposure in HeLa cells; (f) Green lysosome-specific probe Lyso-Tracker Green DND-26L7526 (negative control) (g) Merged image; (h) Bright-field image.*

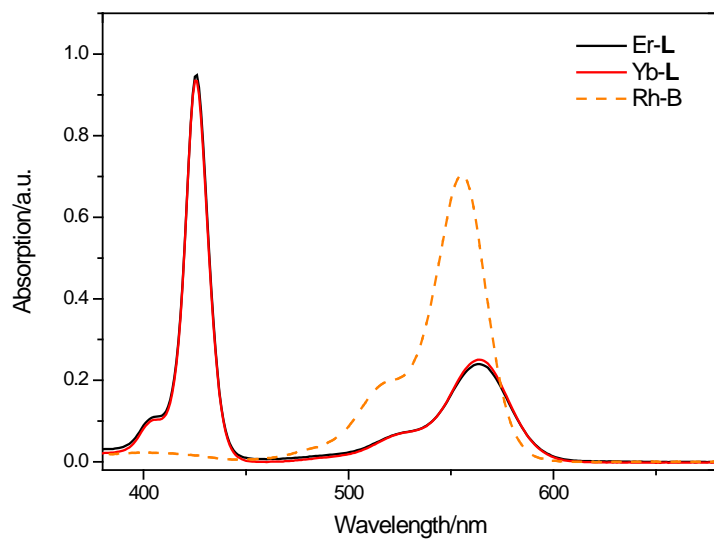

Figure S10 The absorption spectra of Er-L, Yb-L and Rh-B in aqueous solutions. (1  $\mu\text{M}$ )

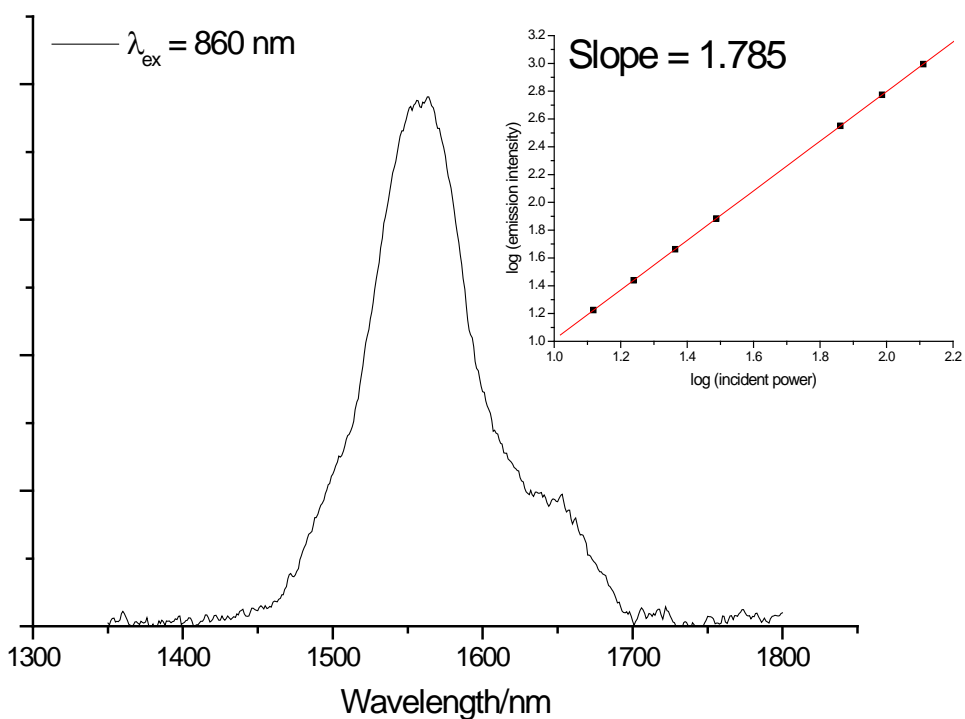

Figure S11. The two-photon induced f-f emission and its power dependence experiment. ( $\lambda_{\text{ex}} = 860 \text{ nm}$ )
